# Supplementary material for: Adding Estimated Cardiorespiratory Fitness to the Framingham Risk Score and Mortality Risk in a Korean Population-Based Cohort Study
Source: MDPI journal article supplement (doi:10.3390/ijerph19010510), 2022-01-03
Supplement: s1 [file s1]

## Legends of Supplemental Tables.

Table S1. The receiver operating curve analysis of estimated cardiorespiratory fitness for all-cause mortality.

..

| Sex.   | AUC (95% CI).        | SE.    | Youden's J. | p value.. |
|--------|----------------------|--------|-------------|-----------|
| Men.   | 0.754 (0.737-0.770). | 0.008. | 0.373.      | <0.001..  |
| Women. | 0.776 (0.757-0.796). | 0.010. | 0.444.      | <0.001..  |

AUC: Under area curve; CI: Confidence interval; SE: Standard error..

Table S2. Cut-off values of estimated cardiorespiratory fitness for all-cause mortality.

| Sex   | Cut-off value<br>(METs) | Sensitivity | Specificity | PPV  | NPV  | Accuracy |
|-------|-------------------------|-------------|-------------|------|------|----------|
| Men   | 9.16                    | 0.587       | 0.786       | 58.6 | 78.6 | 77.5     |
| Women | 6.14                    | 0.668       | 0.776       | 66.6 | 77.6 | 77.3     |

PPV; positive predictive value; NPV: Negative predictive value.
